# Supplementary material for: DNA Methylation in Oocytes and Liver of Female Mice and Their Offspring: Effects of High-Fat-Diet–Induced Obesity
Source: PubMed Central journal article supplement (PMC3915265; doi:10.1289/ehp.1307047), 2013-12-06
Supplement: ehp.1307047.s001.pdf [file ehp.1307047.s001.pdf]

## **Supplemental Material**

# **DNA Methylation in Oocytes and Liver of Female Mice and Their Offspring: Effects of High-Fat-Diet-Induced Obesity**

Zhao-Jia Ge, Shi-Ming Luo, Fei Lin, Qiu-Xia Liang, Lin Huang, Yan-Chang Wei, Yi Hou,

Zhi-Ming Han, Heide Schatten, and Qing-Yuan Sun

### **Table of Contents**

|                                      |   |
|--------------------------------------|---|
| Supplemental Material, Figure 1..... | 2 |
| Supplemental Material, Table 1.....  | 3 |
| Supplemental Material, Table 2.....  | 4 |
| Reference.....                       | 5 |

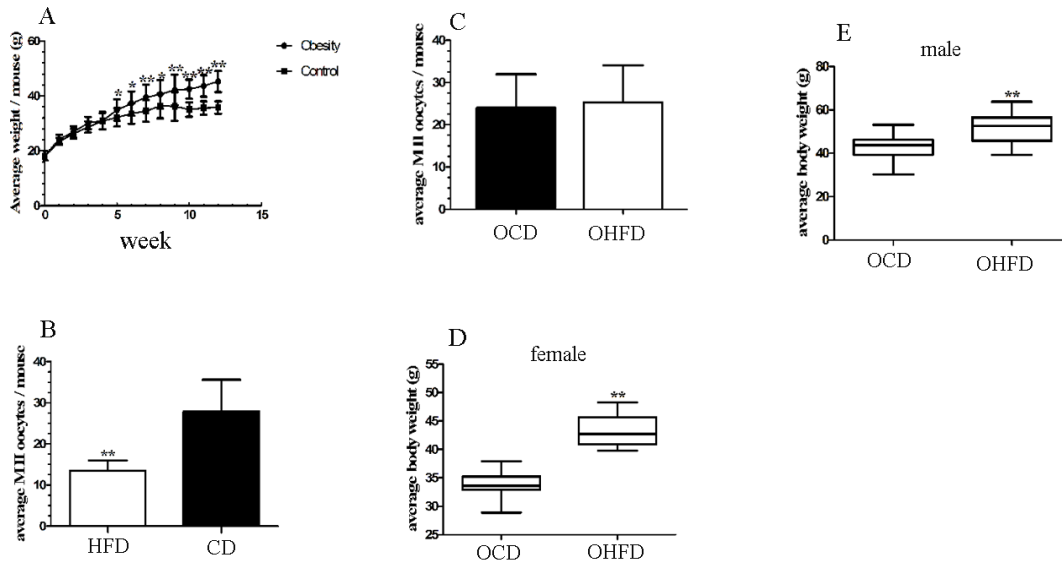

**Supplemental Material, Figure S1. Average body weight and average number of MII oocytes per mouse.** (A) Average body weight per female mouse fed HFD or CD diet was measured each week and represented as mean  $\pm$  SD; (B) mice of HFD (n = 81) and CD (n = 83) were super-ovulated and MII oocytes were collected. Average number of MII oocytes per mouse was counted and represented as mean  $\pm$  SD. White bar, HFD; black bar, CD. (C) The number of MII oocytes per mouse in OHFD (n = 72) and OCD (n = 70) groups was evaluated and represented as mean  $\pm$  SD; White bar, OHFD; black bar, OCD. (D, E) Average body weight of 12 week-old offspring for female (n = 48) and male (n = 47) was evaluated and represented as mean  $\pm$  SD. \*P < 0.05, \*\*P < 0.01.

**Supplemental Material, Table S1.** Composition of D12492 and control diet (CD).

| <b>Component</b>         | <b>D12492</b> | <b>CD</b> |
|--------------------------|---------------|-----------|
| <b>Macronutrient (%)</b> |               |           |
| Protein                  | 26.2          | 27        |
| Carbohydrate             | 26.3          | 48        |
| Fat                      | 34.9          | 4         |
| <b>Ingredient (gm)</b>   |               |           |
| Casein                   | 200           | 200       |
| L-Cystine                | 3             | 3         |
| Corn Starch              | 0             | 325       |
| Maltodextrin             | 125           | 36        |
| Sucrose                  | 68.8          | 350       |
| Cellulose                | 50            | 50        |
| Soybean Oil              | 25            | 23        |
| Lard                     | 245           | 20        |
| Mineral Mix              | 10            | 10        |
| DiCalcium Phosphate      | 13            | 12        |
| Calcium Carbonate        | 5.5           | 5.5       |
| Potassium Citrate        | 16.5          | 16        |
| Vitamin Mix              | 10            | 9.8       |
| Choline Bitartrate       | 2             | 1.7       |
| Total                    | 773.8         | 1062      |

**Note: gm, gram.**

**Supplemental Material, Table S2.** Oligonucleotides utilized for PCR.

| <b>Genes</b>  | <b>Primer name</b> | <b>Primer sequence</b>               |
|---------------|--------------------|--------------------------------------|
| <i>H19</i>    | Forward1           | 5'-GAGTATTTAGGAGGTATAAGAATT-3'       |
| <i>H19</i>    | Reverse1           | 5'-ATCAAAAACAACTAACATAAACCCCT-3'     |
| <i>H19</i>    | Forward2           | 5'-GTAAGGAGATTATGTTTATTTTTGG-3'      |
| <i>H19</i>    | Reverse2           | 5'-CCTCATTAAATCCCATAACTAT-3'         |
| <i>Peg1</i>   | Forward1           | 5'-GATTGTATATAAAAAGGTTAATGAG-3'      |
| <i>Peg1</i>   | Reverse1           | 5'-TCATTAACAAACACAAACCTCCTTAC-3'     |
| <i>Peg1</i>   | Forward2           | 5'-TTTTAGATTTTGAGGGTTTAGGTTG-3'      |
| <i>Peg1</i>   | Reverse2           | 5'-AATCCCTTAAAATCATCTTTCACAC-3'      |
| <i>Peg3</i>   | Forward1           | 5'-TGATAATAGTAGTTTGATTGGTAGGG-3'     |
| <i>Peg3</i>   | Reverse1           | 5'-TAATTCACACCTAAAACCCTAAAACC-3'     |
| <i>Peg3</i>   | Forward2           | 5'-TTTTGTAGAGGATTTTGATAAGGAGG-3'     |
| <i>Peg3</i>   | Reverse2           | 5'-AAATACCACTTAAATCCCTATCACC-3'      |
| <i>Snrpn</i>  | Forward1           | 5'-TATGTAATATGATATAGTTTAGAAATTAG-3'  |
| <i>Snrpn</i>  | Reverse1           | 5'-AATAAACCCAAATCTAAAATATTTAATC-3'   |
| <i>Snrpn</i>  | Forward2           | 5'-AATTTGTGTGATGTTTGTAATTATTTGG-3'   |
| <i>Snrpn</i>  | Reverse2           | 5'-ATAAAATACACTTTCACTACTAAAATCC-3'   |
| <i>Igf2r</i>  | Forward1           | 5'-TTA GTGGGGTATTTTTATTTGTATGG-3'    |
| <i>Igf2r</i>  | Reverse            | 5'-AAATATCCTAAAAATACAACTACAC-3'      |
| <i>Igf2r</i>  | Forward2           | 5'-GTGTGGTATTTTTATGTATAGTTAGG-3'     |
| <i>Leptin</i> | Forward1           | 5'-TGTAAGAGTTGTCGGAAAAAGTAG-3'       |
| <i>Leptin</i> | Reverse1           | 5'-CTATCCACATAACCTCCTTCTTACCTCA-3'   |
| <i>Leptin</i> | Forward2           | 5'-TTGGAAGTATTATTTAAGGGATT-3'        |
| <i>Leptin</i> | Reverse2           | 5'-TTATAACTACCCAATACCACTTAC-3'       |
| <i>Ppar-α</i> | Forward1           | 5'-GGTATTTTGGTTATTTGTTG-3'           |
| <i>Ppar-α</i> | Reverse1           | 5'-AACCCCTAAACACCTAAAACCTA-3'        |
| <i>Ppar-α</i> | Forward2           | 5'-TTTTGGGATTTTAAAGATTAGATTT-3'      |
| <i>Ppar-α</i> | Reverse2           | 5'-CTAAACACCTAAAACCTACACTC-3'        |
| <i>IAP</i>    | Forward1           | 5'-TTGATAGTTGTGTTTTAAGTGGTAAATAAA-3' |
| <i>IAP</i>    | Reverse1           | 5'-AAAACACCACAAACCAAAATCTTCTAC-3'    |
| <i>IAP</i>    | Forward2           | 5'-TTGTGTTTTAAGTGGTAAATAAATAATTTG-3' |
| <i>IAP</i>    | Reverse2           | 5'-CAAAAAAACACCACAAACCAAAAT-3'       |
| <i>GADPH</i>  | Forward            | 5'-TGACCTCAACTACATGGTCTACA-3'        |
| <i>GADPH</i>  | Reverse            | 5'-CTTCCATTCTCGGCCTTG-3'             |
| <i>Leptin</i> | Forward            | 5'-GTGGCTTTGGTCCTATCTGTC-3'          |
| <i>Leptin</i> | Reverse            | 5'-CGTGTGTGAAATGTCATTGATCC-3'        |
| <i>Ppar-α</i> | Forward            | 5'-AACATCGAGTGTCGAATATGTGG-3'        |
| <i>Ppar-α</i> | Reverse            | 5'-CCGAATAGTTCGCCGAAAGAA-3'          |

## Reference

Ge ZJ, Liang XW, Guo L, Liang QX, Luo SM, Wang YP, et al. 2013. Maternal diabetes causes alterations of DNA methylation statuses of some imprinted genes in murine oocytes. *Biol Reprod* 88:117.
